# Supplementary material for: Interplay of Impaired Cellular Bioenergetics and Autophagy in PMM2-CDG
Source: MDPI journal article supplement (doi:10.3390/genes14081585), 2023-08-04
Supplement: s1 [file s1]

|                                | Controls (n=3) |      |      | PMM2-CDG (n=8) |      |      |      |      |      |      |      |
|--------------------------------|----------------|------|------|----------------|------|------|------|------|------|------|------|
| <i>Maximal Respiration</i>     | 0.91           | 1.18 | 0.9  | 0.95           | 0.56 | 0.69 | 0.48 | 0.39 | 0.77 | 0.82 | 0.51 |
| <i>ATP- linked Respiration</i> | 0.97           | 0.99 | 1.13 | 1.32           | 0.64 | 0.64 | 0.48 | 0.44 | 0.9  | 0.98 | 0.69 |

**Supplementary Table 1.** Datapoints of maximal respiration and ATP linked respiration as measured by the MitoStress assay.

|                                      | Controls (n=5) |      |      |      |      | PMM2-CDG (n=8) |      |      |      |      |      |      |      |
|--------------------------------------|----------------|------|------|------|------|----------------|------|------|------|------|------|------|------|
| glycoATP production rate (pmol/min)  | 0.83           | 0.85 | 1.22 | 0.84 | 1.26 | 0.97           | 0.70 | 0.47 | 0.61 | 0.72 | 0.85 | 0.91 | 0.38 |
| mitoATP production rate (pmol/min)   | 1.09           | 1.51 | 0.81 | 1.08 | 0.51 | 0.96           | 0.42 | 1.25 | 0.87 | 0.78 | 1.53 | 1.31 | 1.22 |
| total ATP production rate (pmol/min) | 0.90           | 1.02 | 1.11 | 0.91 | 1.06 | 0.97           | 0.63 | 0.67 | 0.68 | 0.73 | 1.03 | 1.01 | 0.60 |
| XF ATP rate index                    | 1.20           | 1.70 | 0.58 | 1.17 | 0.35 | 0.96           | 0.48 | 2.46 | 1.22 | 0.99 | 1.60 | 1.32 | 3.34 |
| % of glycolysis                      | 0.92           | 0.84 | 1.10 | 0.93 | 1.21 | 1.01           | 1.16 | 0.69 | 0.92 | 1.00 | 0.83 | 0.89 | 0.68 |
| % of oxidative phosphorylation       | 1.21           | 1.44 | 0.72 | 1.19 | 0.43 | 0.98           | 0.56 | 1.84 | 1.22 | 1.00 | 1.45 | 1.29 | 1.86 |

**Supplementary Table 2.** Datapoints of glycoATP, mitoATP and total ATP production rates, XF ATP rate Index,% of glycolysis, % of oxidative phosphorylation as measured by the MitoStress assay.
